# Supplementary material
Source: PubMed Central journal article supplement (PMC4551051)

MOL #99093

*Molecular Pharmacology*

**Supplementary Materials**

**A resveratrol analogue promotes ERK<sup>MAPK</sup>-dependent Stat3 serine and tyrosine phosphorylation alterations and antitumor effects *in vitro* against human tumor cells**

Zachary L. Chelsky, Peibin Yue, Tamara P. Kondratyuk, David Paladino, John M. Pezzuto, Mark Cushman, and James Turkson

Figure Legends

**Fig. S1. Cmpd1 preferentially suppress colony formation of malignant cells.** Cultured human glioma (U251MG and SF295), breast (MDA-MB-231 and MCF7), and pancreatic (Panc-1) cancer cells, and normal NIH3T3 mouse fibroblast were seeded as single-cells and treated once with 0-20  $\mu$ M Cmpd1 and allowed to culture until large colonies were visible, which were stained with crystal violet and imaged. Data are representative of three independent determinations.

**Fig. S2. Effects of Cmpd1 and resveratrol on constitutive or ligand-induced Stat3 and Stat1 activation in normal or mouse transformed fibroblasts.** Immunoprobes of pYStat3, pSer727Stat3, Stat3, pY701Stat1, Stat1 and  $\beta$ -actin from whole-cell lysate preparation from (A and B) v-Src-transformed mouse fibroblasts (NIH3T3/v-Src) harboring aberrantly-active Stat3 untreated or treated for 0-24 h with (A) 15  $\mu$ M Cmpd1 or (B) 20  $\mu$ M resveratrol (Res); or (C) mouse fibroblasts over-expressing the human EGF receptor (NIH3T3/hEGFR) pre-treated with or without 15  $\mu$ M Cmpd1 for 0-24 h and stimulated with EGF for 15 min. The positions of proteins in the gel are labeled; bands corresponding to the phospho-protein levels in the gel were quantified by ImageQuant and calculated as a percent of control (DMSO) relative to the total proteins and the  $\beta$ -actin levels; control lane (-, 0) represents whole-cell lysates prepared from 0.025% DMSO-treated or un-stimulated cells. Data are representative of three independent determinations.

**Fig. S3. Differential effects of Cmpd1 and resveratrol on Src induction in v-Src-transformed mouse fibroblasts.** Immunoblots of pY416Src, Src and  $\beta$ -actin from whole-cell lysate preparation from

v-Src-transformed mouse fibroblasts (NIH3T3/v-Src) harboring aberrantly-active Stat3 untreated or treated for 0-24 h with (A) 15  $\mu$ M Cmpd1 or (B) 20  $\mu$ M resveratrol (Res). The positions of proteins in the gel are labeled; bands corresponding to the phospho-protein levels in the gel were quantified by ImageQuant and calculated as a percent of control (DMSO) relative to the total proteins and the  $\beta$ -actin; control lane (0) represents whole-cell lysates prepared from 0.025% DMSO-treated cells. Data are representative of three independent determinations.

**Fig. S4. Phospho-Erk1/2<sup>MAPK</sup> induction mediated by Cmpd1 and pterostilbene is reversed by MEK inhibitor, PD98059, but not the general protein kinase inhibitor, staurosporine or the inhibitors of p38, mTOR, PI 3-kinase/Akt, or Src.** Immunoblotting analysis of whole-cell lysate preparation from U251MG cells pre-treated with (+) or without (-) the designated concentrations of PD98059, SB202190, LY294002 (LY), dasatinib (Das), rapamycin (Rap) or staurosporine (Staur) for 1 h prior to treatment with (A) 15  $\mu$ M Cmpd1 or (B) 20  $\mu$ M pterostilbene (PTE) and probing for pErk1/2<sup>MAPK</sup> and Erk1/2<sup>MAPK</sup>. The positions of proteins in the gel are labeled; control lane (-) represents whole-cell lysates prepared from 0.025% DMSO-treated cells. Data are representative of two independent determinations.

**Fig. S5. Lack of modulation by Cmpd1 of Stat3 and Erk1/2<sup>MAPK</sup> phosphorylation in normal and v-Ras-transformed mouse fibroblasts.** Immunoblotting analysis of whole-cell lysate preparation from normal (NIH3T3) and v-Ras-transformed (NIH3T3/v-Ras) mouse fibroblasts pre-treated with (+) or without (-) 20  $\mu$ M PD98059 for 1 h prior to treatment with 15  $\mu$ M Cmpd1 and

MOL #99093

probing for pY705Stat3, pS727Stat3, Stat3, pErk1/2<sup>MAPK</sup>, and Erk1/2<sup>MAPK</sup>. The positions of proteins in the gel are labeled; control lane (-) represents whole-cell lysates prepared from 0.025% DMSO-treated cells. Data are representative of two independent determinations.

## Supplementary Figures

Fig. S1

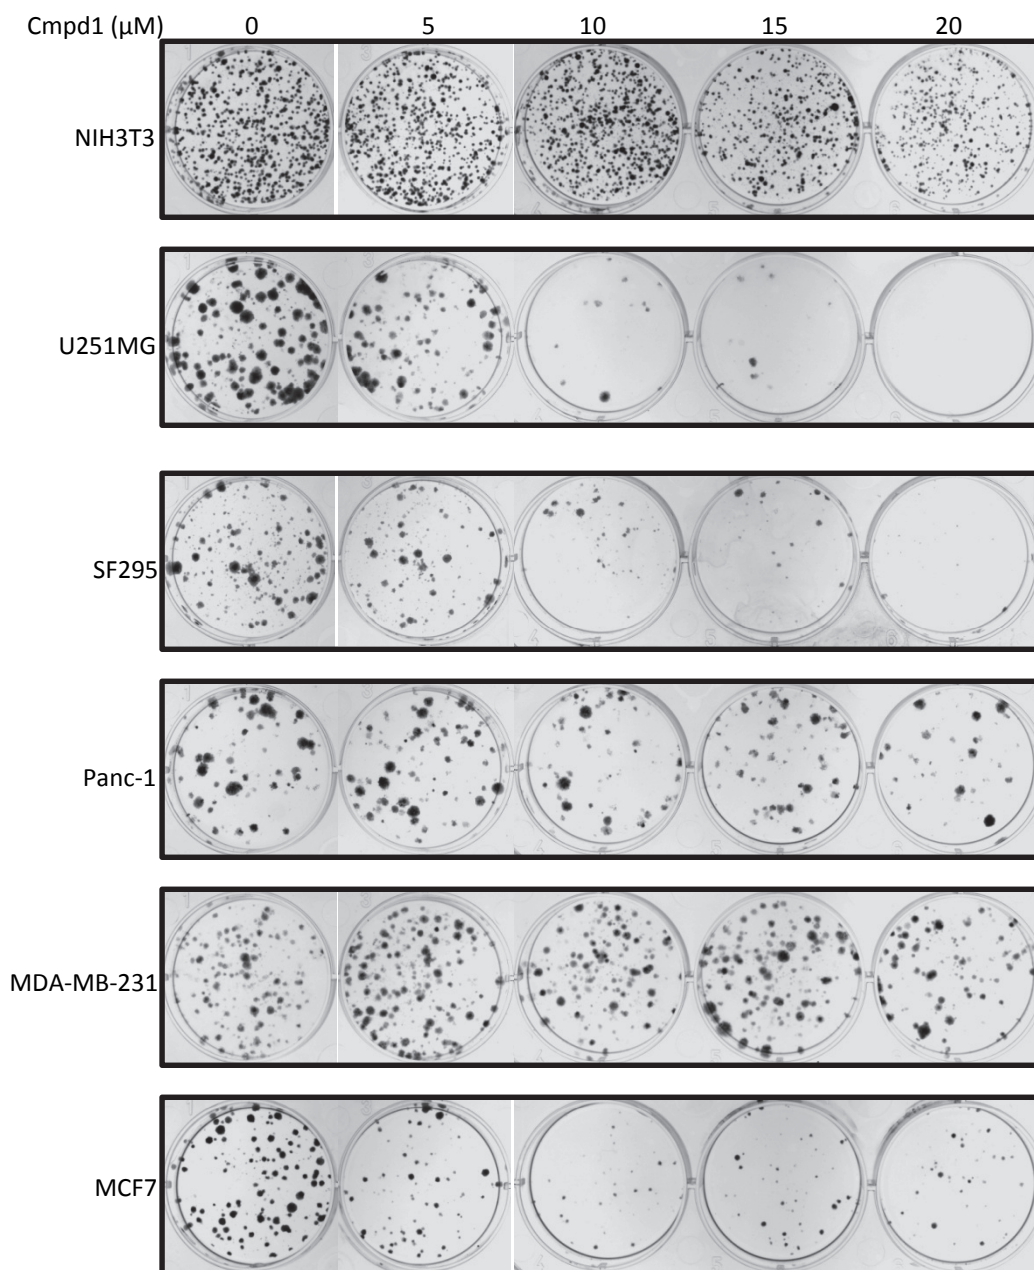

Fig. S2

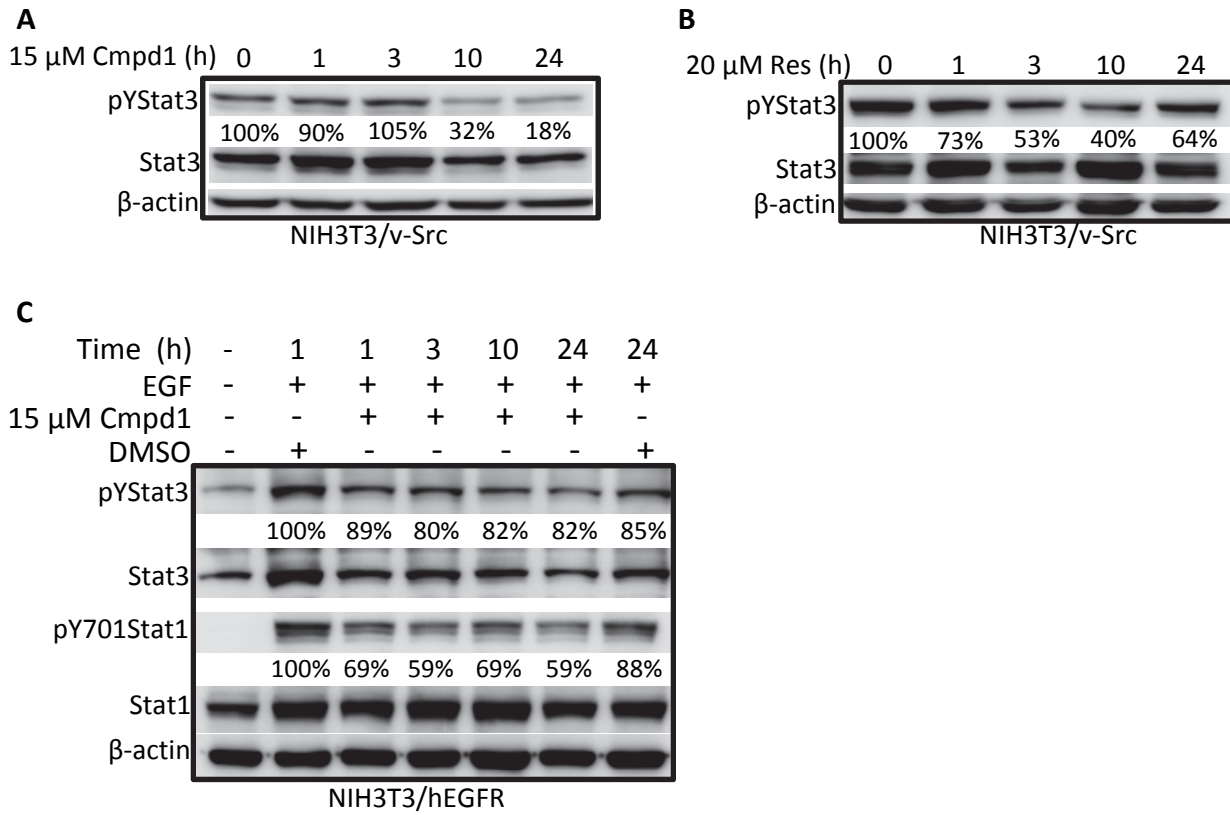

Fig. S3

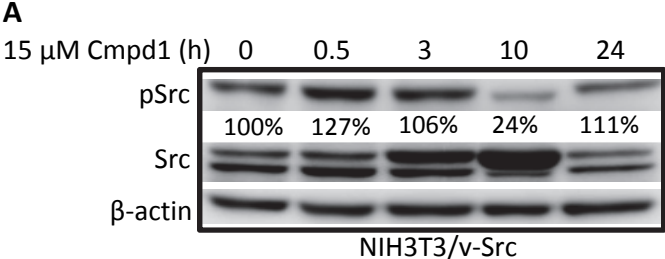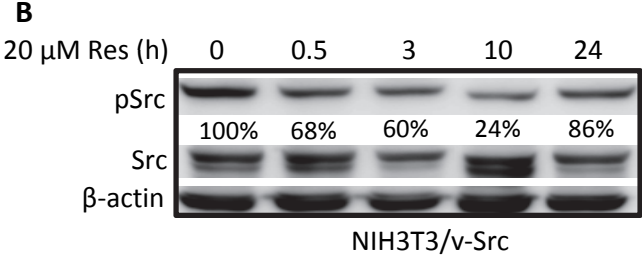

Fig. S4

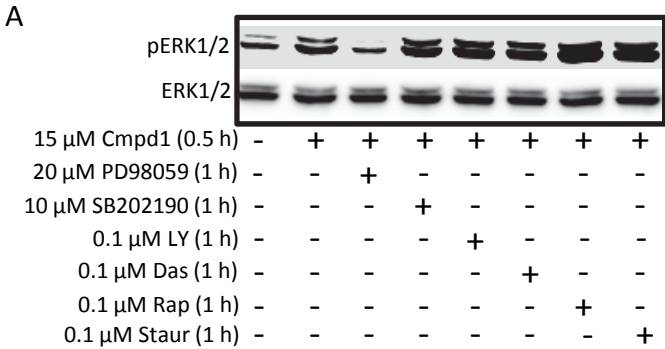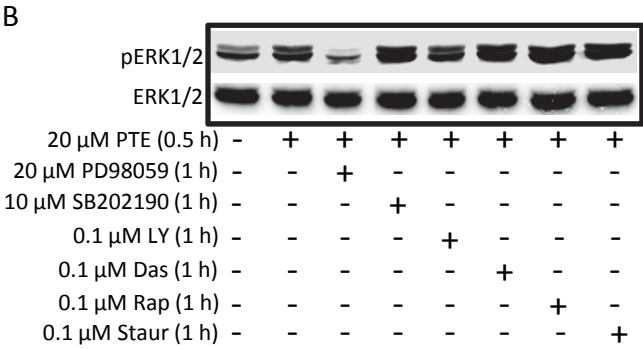



Fig. S5

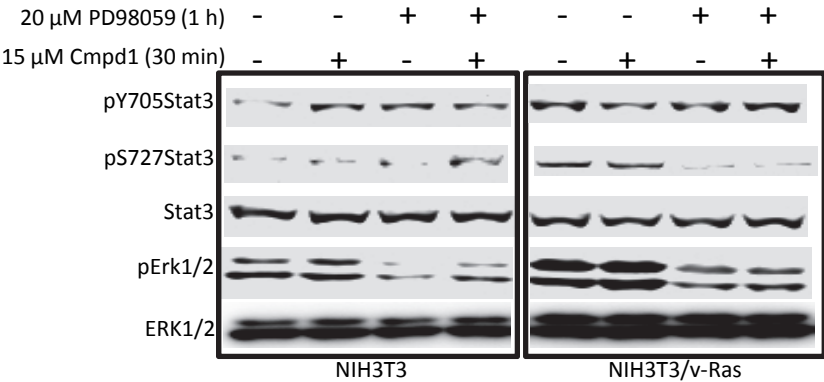

Supplement: supp_mol.115.099093_Supplemental_99093.pdf [file supp_mol.115.099093_Supplemental_99093.pdf]
